# Supplementary material
Source: Springer Nature journal article supplement (https://www.springermedizin.de/resource/supplementary/13256_2014_2882_MOESM1_ESM.pdf/9650746)

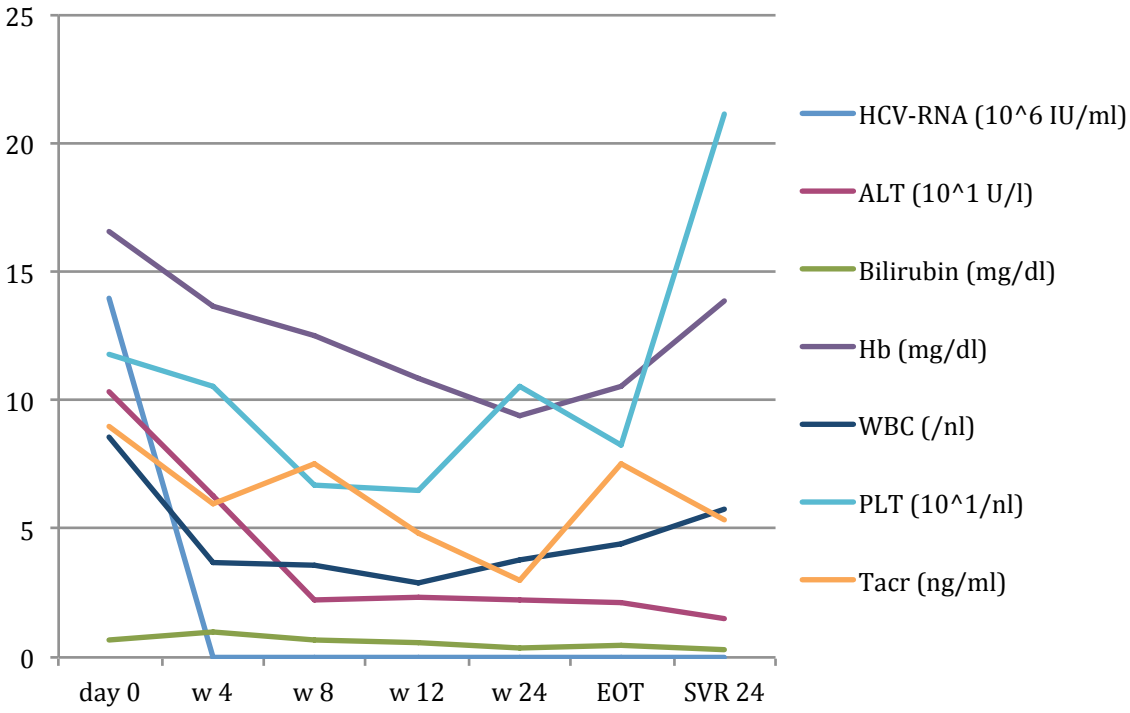

Supplement: MOESM1 [file 9650746]
